# Supplementary material for: Competitive Fitness During Feast and Famine: How SOS DNA Polymerases Influence Physiology and Evolution inEscherichia coli
Source: Oxford University Press journal article supplement (doi:10.1534/genetics.113.151837), 2013-04-16
Supplement: genetics.113.151837-2.pdf [file genetics.113.151837-2.pdf]

**Table S3 Strain-specific Mutation Spectrum**

The absolute number of mutations identified in each class of mutation, as well as the percent of overall mutations they represent, within each strain is provided.

|                  | WT  |     | Pol II <sup>-</sup> |     | Pol IV <sup>-</sup> |     | Pol V <sup>-</sup> |     | Pol V <sup>+</sup> |     | Pol IV <sup>+</sup> |     | Pol II <sup>+</sup> |     | - / - / - |     |
|------------------|-----|-----|---------------------|-----|---------------------|-----|--------------------|-----|--------------------|-----|---------------------|-----|---------------------|-----|-----------|-----|
|                  | #   | %   | #                   | %   | #                   | %   | #                  | %   | #                  | %   | #                   | %   | #                   | %   | #         | %   |
| GC → AT          | 11  | 9%  | 21                  | 17% | 22                  | 17% | 19                 | 15% | 29                 | 22% | 25                  | 20% | 23                  | 18% | 25        | 20% |
| GC → TA          | 22  | 18% | 17                  | 14% | 12                  | 9%  | 10                 | 8%  | 15                 | 12% | 13                  | 10% | 9                   | 7%  | 12        | 9%  |
| GC → CG          | 9   | 7%  | 4                   | 3%  | 4                   | 3%  | 5                  | 4%  | 12                 | 9%  | 5                   | 4%  | 2                   | 2%  | 1         | 1%  |
| AT → GC          | 21  | 17% | 22                  | 18% | 18                  | 14% | 30                 | 24% | 21                 | 16% | 17                  | 13% | 20                  | 16% | 14        | 11% |
| AT → TA          | 27  | 22% | 11                  | 9%  | 38                  | 30% | 15                 | 12% | 17                 | 13% | 18                  | 14% | 13                  | 10% | 39        | 30% |
| AT → CG          | 34  | 27% | 46                  | 38% | 34                  | 27% | 45                 | 36% | 35                 | 27% | 48                  | 38% | 46                  | 36% | 36        | 28% |
| Deletions        | 0   | 0%  | 0                   | 0%  | 0                   | 0%  | 1                  | 1%  | 1                  | 1%  | 2                   | 2%  | 14                  | 11% | 0         | 0%  |
| Insertions       | 1   | 1%  | 0                   | 0%  | 0                   | 0%  | 0                  | 1%  | 0                  | 0%  | 0                   | 0%  | 0                   | 0%  | 1         | 1%  |
| Total Identified | 125 |     | 121                 |     | 128                 |     | 125                |     | 130                |     | 128                 |     | 127                 |     | 128       |     |
