# Supplementary material for: Competitive Fitness During Feast and Famine: How SOS DNA Polymerases Influence Physiology and Evolution inEscherichia coli
Source: Oxford University Press journal article supplement (doi:10.1534/genetics.113.151837), 2013-04-16
Supplement: genetics.113.151837-3.pdf [file genetics.113.151837-3.pdf]

**Table S2 Rif<sup>R</sup> Deletions and Amplifications Identified**

All unique deletions and amplifications in *rpoB* conferring rifampicin resistance (Rif<sup>R</sup>) identified in this study are listed. Some deletions were identified more than once within a given strain. The codons affected are provided.

| Strains                                     | Mutation      | Nucleotide | Previous Codon  | AA Position | Previous AA | New Codon                                  | New AA     |
|---------------------------------------------|---------------|------------|-----------------|-------------|-------------|--------------------------------------------|------------|
| Pol II <sup>+</sup>                         | Deletion      | 1516       | TTC GGT TCC     | 506/8       | FGS         | -                                          | -          |
| Pol II <sup>+</sup>                         | Deletion      | 1519       | GGT TCC         | 507/8       | GS          | -                                          | -          |
| Pol II <sup>+</sup>                         | Deletion      | 1587       | -               | 530         | I           | -                                          | -          |
| Pol II <sup>+</sup>                         | Deletion      | 1594       | GCA             | 532         | A           | -                                          | -          |
| Pol II <sup>+</sup> ,<br>Pol V <sup>+</sup> | Deletion      | 1594       | GCA CTC         | 532/3       | AL          | -                                          | -          |
| Pol IV <sup>+</sup>                         | Deletion      | 1594       | GCA CTC GGC     | 532/4       | ALG         | -                                          | -          |
| Pol II <sup>+</sup>                         | Deletion      | 1594       | GCA CTC GGC CCA | 532/5       | ALGP        | -                                          | -          |
| Pol V <sup>+</sup> ,<br>Pol IV <sup>+</sup> | Deletion      | 1604       | CCA GGC GGT     | 535/7       | PGG         | -                                          | -          |
| WT                                          | Amplification | 1528-1557  | -               | -           | -           | CAG CTG TCT CAG TTT ATG<br>GAC CAG AAC AAC | QLSQFMDQNN |
| - / - / -                                   | Amplification | 1585-1590  | -               | -           | -           | CGT ATC                                    | RI         |
