# Supplementary material for: Competitive Fitness During Feast and Famine: How SOS DNA Polymerases Influence Physiology and Evolution inEscherichia coli
Source: Oxford University Press journal article supplement (doi:10.1534/genetics.113.151837), 2013-04-16
Supplement: genetics.113.151837-4.pdf [file genetics.113.151837-4.pdf]

**Table S1 Rif<sup>R</sup> Single-nucleotide Polymorphisms Identified**

All missense mutations in *rpoB* conferring rifampicin resistance (Rif<sup>R</sup>) identified in this study are listed, along with the number observed within each strain background. Asterisks denote missense mutations conferring rifampicin resistance that to our knowledge have not previously been reported.

| Missense Mutation |               |          |                |           |           | Observed in Strain |                     |                     |                    |                    |                     |                     |           |
|-------------------|---------------|----------|----------------|-----------|-----------|--------------------|---------------------|---------------------|--------------------|--------------------|---------------------|---------------------|-----------|
| Nucleotide        | Previous Base | Mutation | Previous Codon | New Codon | AA Change | Wildtype           | Pol II <sup>-</sup> | Pol IV <sup>-</sup> | Pol V <sup>-</sup> | Pol V <sup>+</sup> | Pol IV <sup>+</sup> | Pol II <sup>+</sup> | - / - / - |
| 428               | G             | C*       | CGT            | CCT       | R143P*    | 0                  | 1                   | 0                   | 1                  | 1                  | 0                   | 0                   | 0         |
| 436               | G             | T        | GTT            | TTT       | V146F     | 1                  | 2                   | 0                   | 1                  | 0                  | 0                   | 1                   | 0         |
| 437               | T             | A*       | GTT            | GAT       | V146D*    | 1                  | 0                   | 0                   | 0                  | 0                  | 0                   | 1                   | 0         |
| 442               | C             | A        | CAG            | AAG       | Q148K     | 0                  | 0                   | 1                   | 0                  | 0                  | 0                   | 0                   | 0         |
| 443               | A             | C        | CAG            | CCG       | Q148P     | 6                  | 6                   | 1                   | 6                  | 2                  | 8                   | 1                   | 4         |
|                   |               | G        | CAG            | CGG       | Q148R     | 2                  | 0                   | 2                   | 0                  | 0                  | 0                   | 0                   | 1         |
|                   |               | T        | CAG            | CTG       | Q148L     | 15                 | 4                   | 24                  | 10                 | 7                  | 11                  | 6                   | 31        |
| 444               | G             | C        | CAG            | CAC       | Q148H     | 0                  | 0                   | 1                   | 0                  | 0                  | 0                   | 0                   | 0         |
|                   |               | T        | CAG            | CAT       | Q148H     | 0                  | 0                   | 0                   | 1                  | 1                  | 0                   | 1                   | 1         |
| 446               | T             | C*       | CTG            | CCG       | L149P*    | 0                  | 0                   | 0                   | 2                  | 0                  | 0                   | 0                   | 0         |
| 448               | C             | G*       | CAC            | GAC       | H150D*    | 0                  | 0                   | 0                   | 0                  | 1                  | 0                   | 0                   | 0         |
| 1525              | A             | C        | AGC            | CGC       | S509R     | 0                  | 0                   | 0                   | 0                  | 1                  | 1                   | 0                   | 1         |
| 1526              | G             | T*       | AGC            | ATC       | S509I*    | 1                  | 0                   | 0                   | 0                  | 0                  | 0                   | 0                   | 0         |
| 1527              | C             | A        | AGC            | AGA       | S509R     | 2                  | 0                   | 1                   | 1                  | 1                  | 1                   | 1                   | 0         |
| 1532              | T             | A        | CTG            | CAG       | L511Q     | 1                  | 1                   | 4                   | 0                  | 3                  | 0                   | 1                   | 2         |
|                   |               | C        | CTG            | CCG       | L511P     | 1                  | 2                   | 0                   | 2                  | 1                  | 0                   | 0                   | 1         |
|                   |               | G        | CTG            | CGG       | L511R     | 2                  | 1                   | 1                   | 3                  | 2                  | 1                   | 1                   | 1         |
| 1534              | T             | C        | TCT            | CCT       | S512P     | 3                  | 4                   | 6                   | 5                  | 7                  | 5                   | 1                   | 4         |
| 1535              | C             | A        | TCT            | TAT       | S512Y     | 0                  | 4                   | 1                   | 3                  | 5                  | 1                   | 2                   | 3         |
|                   |               | T        | TCT            | TTT       | S512F     | 0                  | 0                   | 2                   | 2                  | 2                  | 2                   | 2                   | 1         |
| 1537              | C             | A        | CAG            | AAG       | Q513K     | 1                  | 0                   | 1                   | 0                  | 0                  | 0                   | 0                   | 0         |
|                   |               | G*       | CAG            | GAG       | Q513E*    | 0                  | 0                   | 0                   | 0                  | 0                  | 1                   | 0                   | 0         |
| 1538              | A             | C        | CAG            | CCG       | Q513P     | 5                  | 1                   | 3                   | 5                  | 2                  | 1                   | 4                   | 1         |
|                   |               | G        | CAG            | CGG       | Q513R     | 1                  | 0                   | 1                   | 0                  | 1                  | 2                   | 0                   | 0         |
|                   |               | T        | CAG            | CTG       | Q513L     | 5                  | 2                   | 2                   | 1                  | 1                  | 2                   | 2                   | 2         |
| 1539              | G             | T        | CAG            | CAT       | Q513H     | 0                  | 0                   | 0                   | 0                  | 1                  | 0                   | 0                   | 0         |
| 1546              | G             | A        | GAC            | AAC       | D516N     | 0                  | 1                   | 0                   | 1                  | 0                  | 2                   | 1                   | 0         |
|                   |               | T        | GAC            | TAC       | D516Y     | 1                  | 0                   | 1                   | 1                  | 1                  | 0                   | 0                   | 0         |
| 1547              | A             | C        | GAC            | GCC       | D516A     | 0                  | 0                   | 0                   | 0                  | 0                  | 0                   | 1                   | 0         |
|                   |               | G        | GAC            | GGC       | D516G     | 11                 | 9                   | 7                   | 16                 | 11                 | 7                   | 17                  | 8         |
|                   |               | T        | GAC            | GTC       | D516V     | 0                  | 1                   | 1                   | 3                  | 0                  | 2                   | 1                   | 0         |
| 1552              | A             | G        | AAC            | GAC       | N518D     | 1                  | 0                   | 0                   | 1                  | 0                  | 0                   | 1                   | 0         |
| 1565              | C             | T        | TCT            | TTT       | S522F     | 0                  | 0                   | 2                   | 0                  | 0                  | 0                   | 1                   | 1         |
| 1574              | C             | G        | ACG            | AGG       | T525R     | 0                  | 0                   | 0                   | 0                  | 0                  | 2                   | 0                   | 0         |
| 1576              | C             | A        | CAC            | AAC       | H526N     | 1                  | 4                   | 0                   | 0                  | 0                  | 1                   | 0                   | 0         |
|                   |               | G        | CAC            | GAC       | H526D     | 0                  | 0                   | 1                   | 2                  | 1                  | 1                   | 1                   | 0         |
|                   |               | T        | CAC            | TAC       | H526Y     | 6                  | 7                   | 11                  | 8                  | 12                 | 9                   | 6                   | 10        |

|      |   |    |     |     |        |    |    |    |    |    |    |    |    |
|------|---|----|-----|-----|--------|----|----|----|----|----|----|----|----|
| 1577 | A | T  | CAC | CTC | H526L  | 0  | 2  | 1  | 0  | 1  | 0  | 1  | 0  |
| 1578 | C | A  | CAC | CAA | H526Q  | 0  | 0  | 0  | 0  | 0  | 0  | 0  | 1  |
|      |   | G  | CAC | CAG | H526Q  | 0  | 0  | 0  | 0  | 1  | 0  | 0  | 0  |
| 1585 | C | T  | CGT | TGT | R529C  | 1  | 1  | 1  | 1  | 0  | 0  | 0  | 0  |
| 1586 | G | A  | CGT | CAT | R529H  | 0  | 4  | 1  | 3  | 3  | 1  | 0  | 0  |
|      |   | T  | CGT | CTT | R529L  | 0  | 2  | 0  | 0  | 0  | 0  | 0  | 1  |
| 1592 | C | A  | TCC | TAC | S531Y  | 1  | 1  | 0  | 0  | 1  | 0  | 0  | 0  |
|      |   | G* | TCC | TGC | S531C* | 0  | 0  | 0  | 0  | 1  | 0  | 0  | 0  |
|      |   | T  | TCC | TTC | S531F  | 1  | 2  | 0  | 2  | 2  | 6  | 6  | 3  |
| 1594 | G | C* | GCA | CCA | A532P* | 0  | 1  | 0  | 0  | 0  | 0  | 1  | 0  |
| 1595 | C | A  | GCA | GAA | A532E  | 1  | 0  | 0  | 0  | 2  | 2  | 0  | 1  |
| 1597 | C | G* | CTC | GTC | L533V* | 1  | 0  | 0  | 0  | 0  | 0  | 0  | 0  |
| 1598 | T | A  | CTC | CAC | L533H  | 0  | 0  | 1  | 1  | 0  | 1  | 0  | 1  |
|      |   | C  | CTC | CCC | L533P  | 1  | 6  | 2  | 4  | 1  | 2  | 1  | 0  |
|      |   | G  | CTC | CGC | L533R  | 2  | 0  | 0  | 0  | 0  | 0  | 0  | 1  |
| 1600 | G | A  | GGC | AGC | G534S  | 0  | 1  | 0  | 0  | 3  | 1  | 0  | 3  |
|      |   | T  | GGC | TGC | G534C  | 2  | 2  | 4  | 1  | 0  | 2  | 0  | 1  |
| 1601 | G | A  | GGC | GAC | G534D  | 0  | 1  | 0  | 0  | 1  | 0  | 0  | 1  |
|      |   | C  | GGC | GCC | G534A  | 4  | 1  | 2  | 2  | 3  | 0  | 0  | 1  |
|      |   | T  | GGC | GTC | G534V  | 2  | 0  | 2  | 0  | 2  | 0  | 0  | 0  |
| 1607 | G | T* | GGC | GTC | G536V* | 3  | 0  | 1  | 1  | 0  | 0  | 0  | 0  |
| 1610 | G | A  | GGT | GAT | G537D  | 0  | 1  | 1  | 0  | 2  | 0  | 0  | 0  |
| 1687 | A | C  | ACC | CCC | T563P  | 13 | 31 | 21 | 25 | 18 | 28 | 33 | 18 |
| 1691 | C | A* | CCT | CAT | P564H* | 1  | 0  | 0  | 0  | 0  | 0  | 0  | 0  |
|      |   | T  | CCT | CTT | P564L  | 1  | 3  | 1  | 2  | 2  | 0  | 4  | 2  |
| 1702 | A | G* | AAC | GAC | N568D* | 0  | 1  | 0  | 0  | 0  | 0  | 0  | 0  |
| 1708 | G | T  | GGT | TGT | G570C  | 3  | 2  | 0  | 1  | 0  | 1  | 2  | 1  |
| 1709 | G | C  | GGT | GCT | G570A  | 2  | 1  | 0  | 0  | 4  | 0  | 0  | 0  |
| 1712 | T | A* | CTG | CAG | L571Q* | 0  | 1  | 1  | 0  | 1  | 1  | 0  | 0  |
| 1714 | A | C  | ATC | CTC | I572L  | 3  | 2  | 2  | 3  | 4  | 0  | 1  | 4  |
|      |   | T  | ATC | TTC | I572F  | 2  | 0  | 1  | 0  | 2  | 1  | 1  | 1  |
| 1715 | T | A  | ATC | AAC | I572N  | 3  | 0  | 3  | 0  | 2  | 0  | 0  | 2  |
|      |   | C  | ATC | ACC | I572T  | 1  | 0  | 0  | 0  | 0  | 1  | 0  | 0  |
|      |   | G  | ATC | AGC | I572S  | 3  | 5  | 6  | 3  | 6  | 9  | 5  | 6  |
| 1716 | C | G  | ATC | ATG | I572M  | 1  | 0  | 0  | 0  | 0  | 0  | 0  | 0  |
| 1721 | C | A  | TCT | TAT | S574Y  | 2  | 0  | 0  | 0  | 1  | 5  | 2  | 2  |
|      | C | T  | TCT | TTT | S574F  | 2  | 0  | 2  | 0  | 2  | 4  | 3  | 4  |
| 2060 | G | A  | CGT | CAT | R687H  | 0  | 0  | 1  | 0  | 0  | 0  | 0  | 0  |
