# Supplementary material for: Competitive Fitness During Feast and Famine: How SOS DNA Polymerases Influence Physiology and Evolution inEscherichia coli
Source: Oxford University Press journal article supplement (doi:10.1534/genetics.113.151837), 2013-04-16
Supplement: genetics.113.151837-5.pdf [file genetics.113.151837-5.pdf]

## Extended Experimental Procedures:

**Table S4** qRT-PCR Primers used in this study, related to Figure 6

| Primer Name                    | Sequence (5'-3')      |
|--------------------------------|-----------------------|
| <i>polB</i> (internal) Forward | agttcgaaatcaagcgagga  |
| <i>polB</i> (internal) Reverse | tgcacaatggcactatcgtt  |
| <i>dinB</i> (internal) Forward | gacctgcggtgatgtacaaa  |
| <i>dinB</i> (internal) Reverse | tcgcttcacattcagaccag  |
| <i>umuC</i> (internal) Forward | ttatctgttcccgcctcgttt |
| <i>umuC</i> (internal) Reverse | cagttttaccgacgcgctat  |
| <i>umuD</i> (internal) Forward | tcgtcaaagcaagtggatgat |
| <i>umuD</i> (internal) Reverse | gatggtaatggcgagtagc   |
| <i>polA</i> (internal) Forward | ctttttccagcttcgcaatc  |
| <i>polA</i> (internal) Reverse | agttcaaacgctggactgct  |
| <i>dnaE</i> (internal) Forward | taccatttccacgtcaacga  |
| <i>dnaE</i> (internal) Reverse | cccggacatgatcagttttt  |
| <i>recA</i> (internal) Forward | cagcatcgataaacgcacag  |
| <i>recA</i> (internal) Reverse | gaagaccgttccatggatgt  |
| <i>sulA</i> (internal) Forward | tgcggtgttaaccagagttg  |
| <i>sulA</i> (internal) Reverse | tcaggctatgcacatcgttc  |
| <i>gapA</i> (internal) Forward | gtgatccggctaacctgaaa  |
| <i>gapA</i> (internal) Reverse | gtcctggccagcatatattgt |
| <i>sbmC</i> (internal) Forward | tcgggaagcgtaaagtaacc  |
| <i>sbmC</i> (internal) Reverse | gttgcaggtttccatctcgt  |
| <i>fis</i> (internal) Forward  | cgaacaacgcgtaaattctg  |
| <i>fis</i> (internal) Reverse  | attgcatcaccatgtccaac  |
| <i>lexA</i> (internal) Forward | ttgcaggaagaggaagaagg  |
| <i>lexA</i> (internal) Reverse | ttatgcactgccagcaagtc  |
| <i>dps</i> (internal) Forward  | ctgccatggtatccagatga  |
| <i>dps</i> (internal) Reverse  | tgctttataccgcaacgat   |
