# Supplementary material for: Competitive Fitness During Feast and Famine: How SOS DNA Polymerases Influence Physiology and Evolution inEscherichia coli
Source: Oxford University Press journal article supplement (doi:10.1534/genetics.113.151837), 2013-04-16
Supplement: genetics.113.151837-6.pdf [file genetics.113.151837-6.pdf]

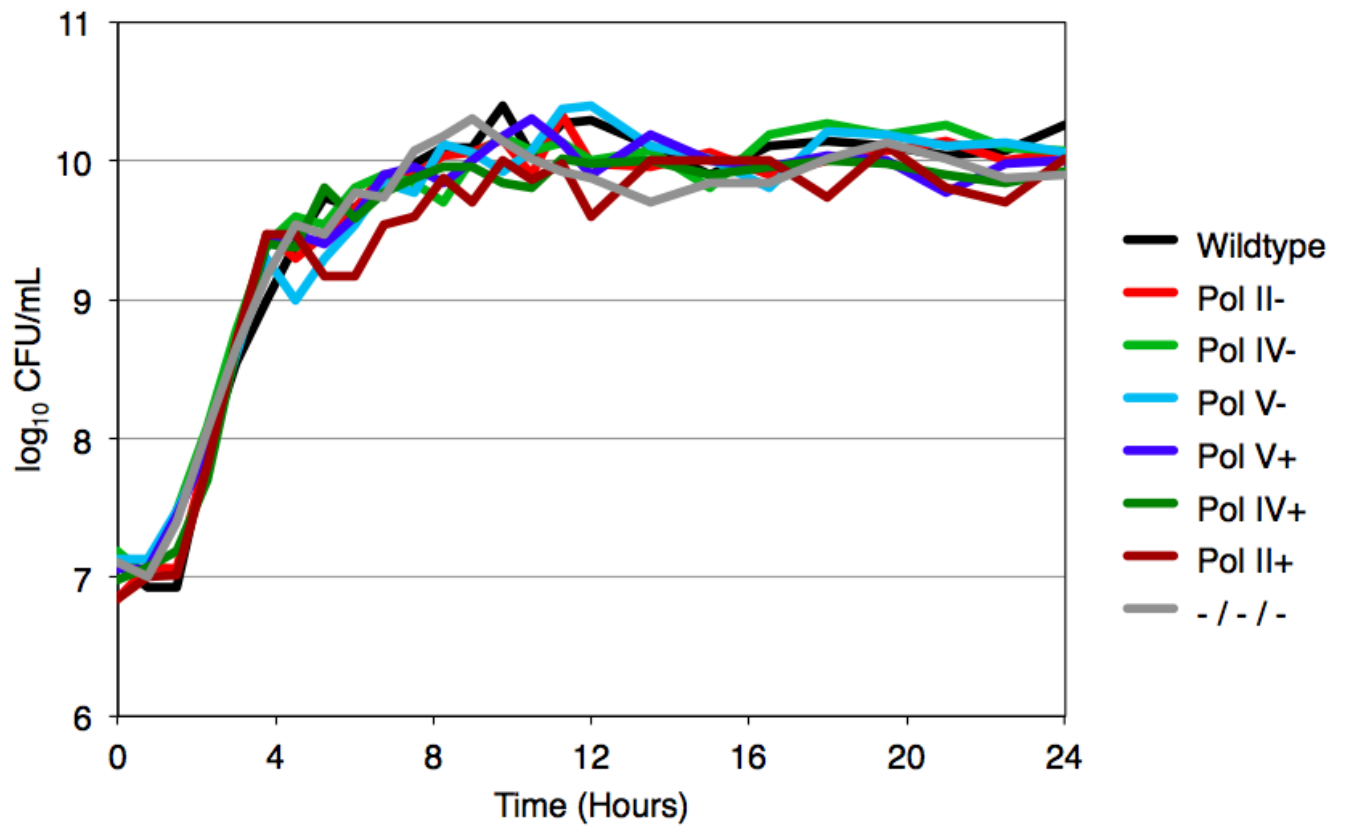

**Figure S1 Outgrowth of Polymerase-deficient Mutant Strains**

Cell densities of the wild type and all combinations of mutant strains are plotted for 24 hours of growth in LB. Timepoints were taken every 45 minutes for the first 12 hours and every 90 minutes during the second 12 hours. All strains exhibited indistinguishable growth curves; representative data are shown. Black, wild type; light red, Pol II<sup>-</sup>; light green, Pol IV<sup>-</sup>; light blue, Pol V<sup>-</sup>; dark blue, Pol V<sup>+</sup>-only; dark green, Pol IV<sup>+</sup>-only; dark red, Pol II<sup>+</sup>-only; gray, triple mutant.
